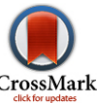

## Correction

# Correction: A Role for Homeostatic Drive in the Perpetuation of Complex Chronic Illness: Gulf War Illness and Chronic Fatigue Syndrome

The PLOS ONE Staff

An error occurred in Equation 2 causing “...” to be replaced with a double arrow. Please see the corrected Equation 2 here:

$$x_i(t+1) = \begin{cases} \left( x_{i1}^A(t) \vee x_{i2}^A(t) \dots x_{ij}^A(t) \right) \nabla \left( x_{i1}^I(t) \vee x_{i2}^I(t) \dots x_{ik}^I(t) \right) \\ \left( x_{i1}^A(t) \vee x_{i2}^A(t) \dots x_{ij}^A(t) \right) \\ \neg \left( x_{i1}^I(t) \vee x_{i2}^I(t) \dots x_{ik}^I(t) \right) \end{cases} \quad (2)$$

## Reference

1. Craddock TJA, Fritsch P, Rice MA Jr, del Rosario RM, Miller DB, et al. (2014) A Role for Homeostatic Drive in the Perpetuation of Complex Chronic Illness: Gulf War Illness and Chronic Fatigue Syndrome. PLoS ONE 9(1): e84839. doi:10.1371/journal.pone.0084839

**Citation:** The PLOS ONE Staff (2014) Correction: A Role for Homeostatic Drive in the Perpetuation of Complex Chronic Illness: Gulf War Illness and Chronic Fatigue Syndrome. PLoS ONE 9(4): e94161. doi:10.1371/journal.pone.0094161

**Published:** April 3, 2014

**Copyright:** © 2014 The PLOS ONE Staff. This is an open-access article distributed under the terms of the Creative Commons Attribution License, which permits unrestricted use, distribution, and reproduction in any medium, provided the original author and source are credited.
